# Supplementary material for: Co-activation of Akt, Nrf2, and NF-κB signals under UPRER in torpid Myotis ricketti bats for survival
Source: PubMed Central journal article supplement (PMC7658203; doi:10.1038/s42003-020-01378-2), 2020-11-11
Supplement: 42003_2020_1378_MOESM3_ESM.pdf [file 42003_2020_1378_MOESM3_ESM.pdf]

## **Description of Additional Supplementary Files**

**Supplementary Data 1.** Original data of volcano plot.

**Supplementary Data 2.** Results of IPA analysis.

**Supplementary Data 3.** Detailed information on heat maps in Fig. 3a.

**Supplementary Data 4.** Detailed information on heat maps in Fig. 3b.

**Supplementary Data 5.** Body weight, food intake, and rectal temperature of mice.

**Supplementary Data 6.** Non-overlapped protein names used in GO and IPA analysis.

**Supplementary Data 7.** Closeness centrality of highly connected proteins.

**Supplementary Data 8.** Antibodies used in this study.

**Supplementary Data 9.** Source data for all bar graphs.
